# Supplementary material for: Mechanism of calcium hydroxide-reinforced magnesium-loaded clinoptilolite/phosphoric acid-modified biochar for NH3-N removal from rare earth element tailing wastewater
Source: Royal Society of Chemistry journal article supplement (doi:10.1039/d2ew00769j), 2023-01-01
Supplement: d2ew00769j1.pdf [file d2ew00769j1.pdf]

*Supplementary Material*

**Mechanism of calcium hydroxide-reinforced magnesium-loaded  
clinoptilolite/phosphoric acid-modified biochar for NH<sub>3</sub>-N removal  
from rare earth element tailings wastewater**

Yurong Wang<sup>1, 2</sup>, Changfeng Ding<sup>1</sup>, Jinyi Chen<sup>3</sup>, Fengxiang X. Han<sup>4</sup>, Zhigao Zhou<sup>1</sup>, Taolin Zhang<sup>1</sup>,

Xingxiang Wang<sup>1, \*</sup>

<sup>1</sup> CAS Key Laboratory of soil environment and pollution remediation, Institute of soil science, Chinese  
academy of sciences, Nanjing 210008, China

<sup>2</sup> University of Chinese academy of science, Beijing 100049, China

<sup>3</sup> School of Chemistry and Environmental Engineering, Wuhan Institute of Technology, Wuhan 430000,  
China

<sup>4</sup> Department of Chemistry, Physics and Atmospheric Sciences, Jackson State University, Jackson,  
Mississippi 39217, United States

\* Corresponding authors:

E-mail address: xxwang@issas.ac.cn (Xingxiang Wang)

**Table A1** Basic properties of wastewater samples

|                      | pH           | NH <sub>3</sub> -N<br>(mg/L) | COD<br>(mg/L) | Sc<br>(μg/L) | Y<br>(μg/L)  | La<br>(μg/L) | Ce<br>(μg/L) | Pr<br>(μg/L) | Nd<br>(μg/L)   | Sm<br>(μg/L) |
|----------------------|--------------|------------------------------|---------------|--------------|--------------|--------------|--------------|--------------|----------------|--------------|
| Simulated wastewater | 5.60         | 210.90                       | ND            | ND           | ND           | ND           | ND           | ND           | ND             | ND           |
| Wastewater 1         | 3.62         | 13.14                        | ND            | 0.33         | 1087         | 1429         | 579          | 300          | 898            | 218          |
| Wastewater 2         | 4.40         | 55.50                        | ND            | 1.10         | 2400         | 3554         | 1340         | 736          | 2242           | 501          |
| Wastewater 3         | 4.37         | 138.16                       | 0.58          | 0.65         | 2841         | 3947         | 1346         | 854          | 2411           | 623          |
|                      | Eu<br>(μg/L) | Tb<br>(μg/L)                 | Dy<br>(μg/L)  | Ho<br>(μg/L) | Er<br>(μg/L) | Tm<br>(μg/L) | Yb<br>(μg/L) | Lu<br>(μg/L) | REEs<br>(μg/L) |              |
| Simulated wastewater | ND           | ND                           | ND            | ND           | ND           | ND           | ND           | ND           | ND             |              |
| Wastewater 1         | 16.70        | 42.30                        | 210           | 43.50        | 111          | 18.30        | 102          | 17.80        | 5287.93        |              |
| Wastewater 2         | 38.50        | 95                           | 469           | 92.90        | 234          | 35.30        | 194          | 30.10        | 12475.9        |              |
| Wastewater 3         | 41.10        | 103                          | 474           | 104          | 241          | 40.40        | 204.60       | 34.60        | 13874.35       |              |

Table A2 The content of elements in the composite

|    | NC-Mg | BC-PC |
|----|-------|-------|
| O  | 42.26 | 29.76 |
| Al | 5.92  | 0     |
| Si | 45.89 | 0     |
| Ca | 1.73  | 2.01  |
| Mg | 4.2   | 0.98  |
| P  | 0     | 2.95  |
| H  | 0     | 3.9   |
| N  | 0     | 1.4   |
| K  | 0     | 0.36  |
| C  | 0     | 56.63 |
| Na | 0     | 2.01  |

**Table A3** NH<sub>3</sub>-N removal rate by the composite and equivalent adsorption materials

|          | Removal efficiency (%) |
|----------|------------------------|
| NC/BC/Ca | 64.6 ± 1.5             |
| NC/BC 2  | 10.6 ± 0.6             |

**Table A4** The relationship between the amount of alkaline material and the pH

| Ca(OH) <sub>2</sub> dosage (g) | pH    | NaOH dosage (g) | pH    |
|--------------------------------|-------|-----------------|-------|
| 0                              | 3.88  | 0               | 3.88  |
| 0.010                          | 6.26  | 0.0084          | 6.06  |
| 0.020                          | 8.02  | 0.013           | 8.03  |
| 0.032                          | 9.00  | 0.031           | 8.97  |
| 0.050                          | 10.74 | 0.040           | 9.97  |
| 0.10                           | 12.15 | 0.073           | 11.07 |
| 0.15                           | 12.40 | 0.10            | 11.90 |
| 0.20                           | 12.50 | 0.25            | 12.50 |

**Table A5** Contribution rate of NH<sub>3</sub>-N removal of NC/BC/Ca in different ways

|                                    | Removal<br>rate/% | Contribution rate / % |              |                             |                          |
|------------------------------------|-------------------|-----------------------|--------------|-----------------------------|--------------------------|
|                                    |                   | % Volatilization      | % Adsorption | % Struvite<br>precipitation | % Other<br>precipitation |
| Volatilization<br>experiment       | 2.8%              | 4.3%                  | ----         | ----                        | ----                     |
| Adsorption<br>experiment (NC/BC 2) | 10.6%             | ----                  | 16.4%        | ----                        | ----                     |
| NC/BC/Na                           | 33.3%             | 4.3%                  | 16.4%        | 30.8 %                      | ----                     |
| NC/BC/Ca                           | 64.6%             | 4.3%                  | 16.4%        | 30.8%                       | 48.5%                    |

**Table A6** Effects of plant yield and soil pH in farmland by application of the sediments

|                       | Rice ( <i>Oryza sativa L</i> ) |         | Amaranth ( <i>Amaranthus tricolor L</i> ) |         |
|-----------------------|--------------------------------|---------|-------------------------------------------|---------|
|                       | Grain yield (g/plant)          | Soil pH | Biomass (g/plant)                         | Soil pH |
| CK                    | 10.71                          | 5.00    | 38.2                                      | 5.97    |
| Sediments application | 12.35                          | 5.53    | 44.0                                      | 6.35    |

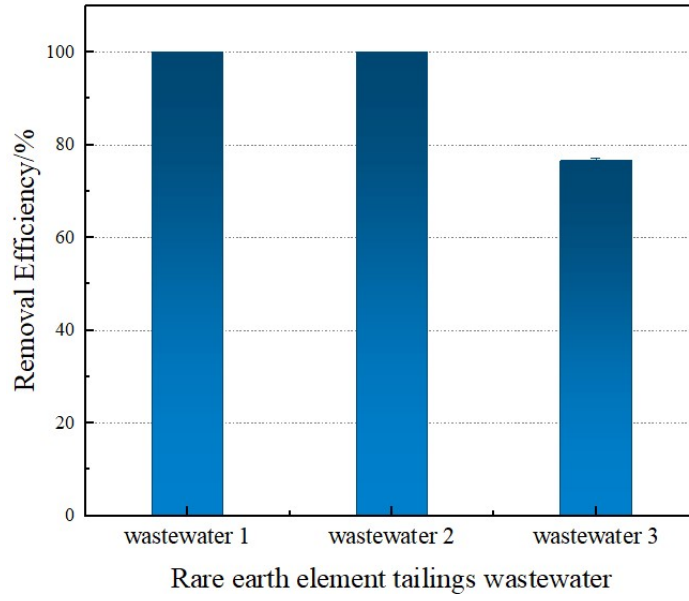

**Fig. A1.** NH<sub>3</sub>-N removal efficiency with NC/BC/Ca from REEs wastewaters. Dates represent the mean  $\pm$  standard error of the mean (n=3).
